disciplina, siempre en abstracto, pero no aplicados a la solución de los grandes problemas nacionales y a integrar a los sectores del trabajo en una verdadera empresa común de la que puedan sentirse participantes." But as Ciria concludes, "Si bien un país no puede ser gobernado permanentemente como un cuartel, tampoco debe serlo como un comité de la política tradicional o la gerencia de una empresa extranjera" (p. 354).

J. R. S.

*New Brazilian Art.* By PIETRO MARIA BARDI. New York, 1970. Praeger Publishers. Illustrations. Index. Pp. 160. \$20.00.

This book amounts to a large permanent art exhibit selected and arranged by Brazil's most distinguished museum director. The 731 clear illustrations cover Indian and popular art, painting, sculpture and architecture, graphic and industrial design, and cinema—which is to say every product in which an artist or designer has intervened. There are also two pages on music. The coverage of these fields is superficial but comprehensive over the last fifty years, dating from that cultural divide, Modern Art Week in São Paulo during 1922.

The similarity between the book and an exhibit extends to the text, which consists of brief caption-like essays. The longest and by far the best is that under the title "The approach to modernity," in which Modern Art Week and the development of modern architecture are discussed. But even this essay suffers from the overgeneralization, gratuitous value judgments, and excessively casual presentation which are the principal features of the other essays.

The biographical notes share that style, e.g.: "Grassmann, Marcello (1925, San Simão, SP)—Engraver. Dedicating himself spontaneously to engraving and drawing, choosing creatures of phantasy as his favourite subjects. His supreme skill wins him the well-deserved fame as the greatest

designer and engraver of the country."

"Freitas, Ivan (1930, Rio de Janeiro, GB)—Painter." The single work by Freitas shown is attributed to J. Freitas.

The historical carelessness of the book is exemplified by the section beginning on page 38: "As if the country's immense problems did not exist, a calm and peaceful Brazil was depicted by numerous artists between the two wars. . . ." Four of the accompanying eleven illustrations date from after 1940, one as late as 1950. Bardi's attitude centers in the idea that the role of the artist is to grapple with the country's problems. This rather dated Positivism and the remark that "there is some work of social improvement going on in Brazil today, such as . . . the wide diffusion of the automobile" (p. 146), make one wonder if Bardi can distinguish between a social problem and a solution.

The book has a place in research libraries as a source of pictorial material. But even as an archive it must be used cautiously. A Grassmann drawing shares a page with *Playboy* cartoons of 1965 by a Viennese who came to Brazil in 1965 and now lives in Madrid. To call that Brazilian art is surely stretching the point and suggests that Bardi feels a desperate insufficiency of genuine Brazilian art and artists. Fifty years of Brazilian art are worthy of a more careful and serious presentation than this.

TERENCE GRIEDER

University of Texas

#### OTHER BOOKS RECEIVED

*The Development of the Guatemalan Military.* By RICHARD N. ADAMS. Austin, 1969. University of Texas. Institute of Latin American Studies. Offprint Series. Tables. Notes. Bibliography. Pp. 10. Paper.

*Boletín cultural y bibliográfico.* Vol. XII, Nos. 8, 9. Bogotá, 1969. Banco de la República. Biblioteca Luis-Ángel Arango. Illustration. Tables. Pp. 192, 192. Paper.

- Boletín histórico*. No. 22. Caracas, 1970. Fundación John Boulton. Illustrations. Pp. 126. Paper.
- A Survey of the Portuguese Language Luso-Brazilian and Latin American Area Studies in Institutions of Higher Learning in the United States*. Prepared by the BRAZILIAN EMBASSY and the BRAZILIAN AMERICAN CULTURAL INSTITUTE. Washington, D.C., 1970. Brazilian Embassy. Pp. 106. Paper.
- Quarup*. By ANTÔNIO CALLADO. Translated by BARBARA SHELBY. New York, 1970. Alfred A. Knopf. Pp. 559. \$8.95.
- La producción agropecuaria chilena, aspectos cuantitativos (1680-1830)*. By MARCELLO CARMAGNANI. Paris, 1969. Cahiers des Amériques Latines. Série Sciences de l'Homme. Tables. Charts Pp. 21. Paper.
- Historia del folklore iberoamericano. Las culturas criollas desde sus comienzos hasta 1965*. By PAULO DE CARVALHO-NETO. Santiago, 1969. Editorial Universitaria. Colección Imagen de América Latina. Tables. Figures. Bibliography. Index. Pp. 212. Paper.
- Land and Society in Colonial Mexico. The Great Hacienda*. By FRANÇOIS CHEVALIER. Translated by ALVIN EUSTIS. Edited and with an introduction by LESLEY BYRD SIMPSON. Berkeley, 1970. University of California Press. Illustrations. Map. Glossary. Bibliography. Index. Pp. ix, 334. Paper. \$3.25.
- Historia de las agitaciones campesinas andaluzas-Córdoba. (Antecedentes para una reform agraria.)* 2nd ed. By JUAN DÍAZ DEL MORAL. Madrid, 1969. Editorial Alianza. Sección Humanidades. Bibliography. Pp. 508. Ptas. 100.00 (Span.).
- Death in Murelaga. Funerary Ritual in a Spanish Basque Village*. By WILLIAM A. DOUGLASS. Seattle, 1969. University of Washington Press.
- Tables. Figures. Glossary. Appendix. Bibliography. Index. Pp. xiv, 240. \$7.50.
- Esencia de hispanoamérica*. By ROBERTO ESQUENAZI-MAYO and CARMEN ESQUENAZI-MAYO. New York, 1969. Holt, Rinehart and Winston. Illustrations. Maps. Pp. viii, 206. \$5.80.
- Religious and Cultural Factors in Latin America. Papers presented at the Midwest Council of the Association of Latin American Studies, St. Louis University, October 24-26, 1968*. By CHARLES J. FLEENER and HARRY J. CARGAS. St. Louis, 1970. St. Louis University. Office of International Programs. Pp. xiii, 159. Paper. \$3.95.
- This Crowded World. An Introduction to the Study of Population*. By LILLIAN B. FRANKEL. Washington, D.C., 1970. Columbia Books. Illustrations. Tables. Pp. 60. Paper. \$1.50.
- Democracy in Mexico*. 2nd ed. By PABLO GONZÁLEZ CASANOVA. Translated by DANIELLE SALT. Foreword by IRVING LOUIS HOROWITZ. New York, 1970. Oxford University Press. Tables. Indices. Pp. xvii, 245. \$7.95.
- Politics in a Mexican Community*. By LAWRENCE S. GRAHAM. Gainesville, 1968. University of Florida Press. Appendices. Bibliography. Pp. 73. Paper.
- Paraguay 1852 and 1968*. By EDWARD A. HOPKINS *et al.* New York, 1968. American Geographical Society. Occasional Publication. Maps. Pp. 64. Paper. \$4.00.
- Sitios de las cordilleras y monumentos de los pueblos indígenas de América*. By ALEXANDER VON HUMBOLDT. Introduction by FERNANDO MÁRQUEZ MIRANDA. Buenos Aires, 1968. Librería Hachette. Biblioteca "Dimensión Americana". Illustrations. Tables. Pp. 297. Paper.
- La poesía de la generación del 27*. By JOSÉ LUIS CANO. Madrid, 1970.

- Ediciones Guadarrama. Colección **Universitaria de Bolsillo**. Punto Omega. Bibliography. Pp. 290. Paper.
- The Shu'ubiyya in Al-Andalus: The Risala of Ibn García and Five Refutations*. Translated and with an introduction and notes by JAMES T. MONROE. Berkeley, 1970. University of California Press. Near Eastern Studies. Bibliography. Pp. 105. Paper. \$3.50.
- Las fuerzas armadas en la política hispanoamericana*. By SALVADOR MARÍA LOZADA. Buenos Aires, 1967. Editorial Colombia. Colección Esquemas. Illustration. Pp. 95. Paper.
- La lírica popular contemporánea. España. México. Argentina*. By CARLOS H. MAGIS. México, 1969. El Colegio de México. Centro de Estudios Lingüísticos y Literarios. Glossary. Bibliography. Indices. Pp. 724.
- American Imperialism in 1898. The Quest for National Fulfillment*. Edited by RICHARD H. MILLER. New York, 1970. John Wiley and Sons. Problems in American History. Maps. Bibliography. Pp. vii, 206. Cloth. \$6.95. Paper. \$2.95.
- Lower California and Its Natural Resources*. Reproduction of 1922 ed. By EDWARD W. NELSON. Introduction by HUGH MANESSIER and PAUL H. OEHSER. Riverside, 1966. Manessier Publishing Co. Illustrations. Maps. Tables. Bibliography. Index. Pp. xvi, 194. \$10.00.
- La revolución de 1930 y el dominio del petróleo*. By JOSÉ NOVAU. Rosario, 1968. Librería y Editorial Ruiz. Pp. 31. Paper.
- Revista de História*. Vol. 39, No. 80. São Paulo, 1969. Universidade de São Paulo. Tables. Pp. 511. Paper.
- Revista de Occidente*. Madrid, 1970. Ediciones Castilla. Pp. 383. Paper.
- El programa de estudios. Naturaleza, objetivos, planeamiento, aplicación y evaluación*. Prepared by the SECRETARÍA GENERAL, ORGANIZACIÓN DE LOS ESTADOS AMERICANOS. Washington, D.C., 1969. Organización de los Estados Americanos. Departamento de Asuntos Educativos. Chart. Appendices. Bibliography. Pp. iii, 100. Paper.
- National Development and Sectional Crisis, 1815-1860*. Edited by JOEL H. SILBEY. Preface by ALLEN WEINSTEIN and FRANK OTTO GATELL. New York, 1970. Random House. Random House Readings in American History. Tables. Pp. 238. Paper.
- Daily Life of the Aztecs on the Eve of the Spanish Conquest*. By JACQUES SOUSTELLE. Translated by PATRICK O'BRIAN. Stanford, 1970. Stanford University Press. Maps. Bibliography. Index. Pp. xxiv, 321. Paper. \$2.95.
- Valle-Inclán: Páginas selectas*. By RAMÓN DEL VALLE-INCLÁN. Edited by JOSEPH MICHEL. Englewood Cliffs, 1969. Prentice-Hall. Bibliography. Pp. 198. Paper. \$3.25.
- Venezuela Election Factbook December 1, 1968*. Edited by DAVID EUGENE BLANK. Washington, D.C., 1968. Operations and Policy Research. Institute for the Comparative Study of Political Systems. Illustration. Maps. Tables. Pp. 50. Paper. \$2.00.
- Historia de la revolución mexicana. Orígenes y resultados*. 2nd ed. By JORGE VERA ESTAÑOL. México, 1967. Editorial Porrúa. Tables. Index. Pp. xviii, 797. Paper. \$60.00 (Mex.).
- The Growth and Culture of Latin America. From Conquest to Independence*. Vol. I. 2nd ed. By DONALD E. WORCESTER and WENDELL G. SCHAEFFER. New York, 1970. Oxford University Press. Maps. Glossary. Index. Pp. xv, 512. Paper.
